# Supplementary material for: A Novel Proposal of Salivary Lymphocyte Detection and Phenotyping in Patients Affected by Sjogren’s Syndrome
Source: MDPI journal article supplement (doi:10.3390/jcm9020521), 2020-02-14
Supplement: s1 [file s1]

**Supplementary Materials:** The following are available online at [www.mdpi.com/xxx/s1](http://www.mdpi.com/xxx/s1), Figure S1: Parenchymatous parotitis X-rays, Figure S2: Labial salivary gland biopsy (hematoxylin-eosin  $\times 200$ ), Figure S3: Representative set of scatter-plots of a patient with SS, Figure S4: The relative number of subpopulations of T-helpers (CD4+) and cytotoxic T-lymphocytes (CD8+) in the studied groups of patients. Table S1: Cytological analysis of salivary sediment in studied patients, Table S2: Lymphocytes percentage in the cellular composition of salivary sediment in studied patients. Table S3: Immunogram of parotid saliva of the studied patients.

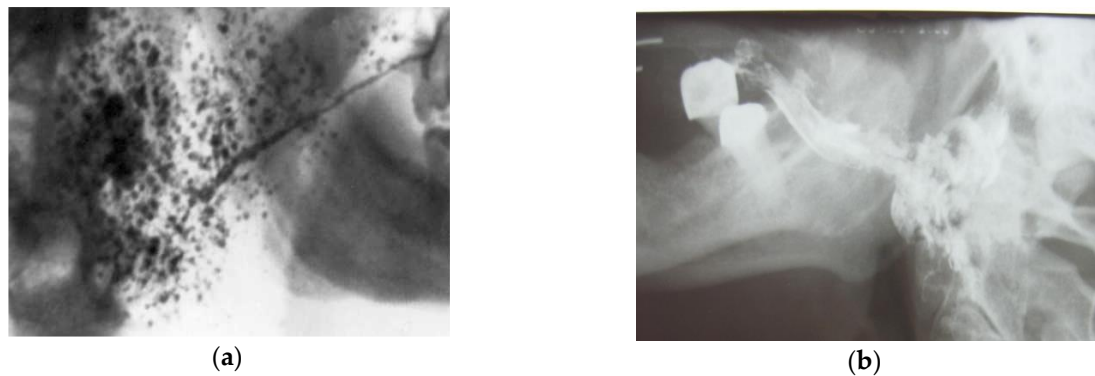

**Figure S1:** Parenchymatous parotitis X-rays: (a) advanced stage, (b) late stage.

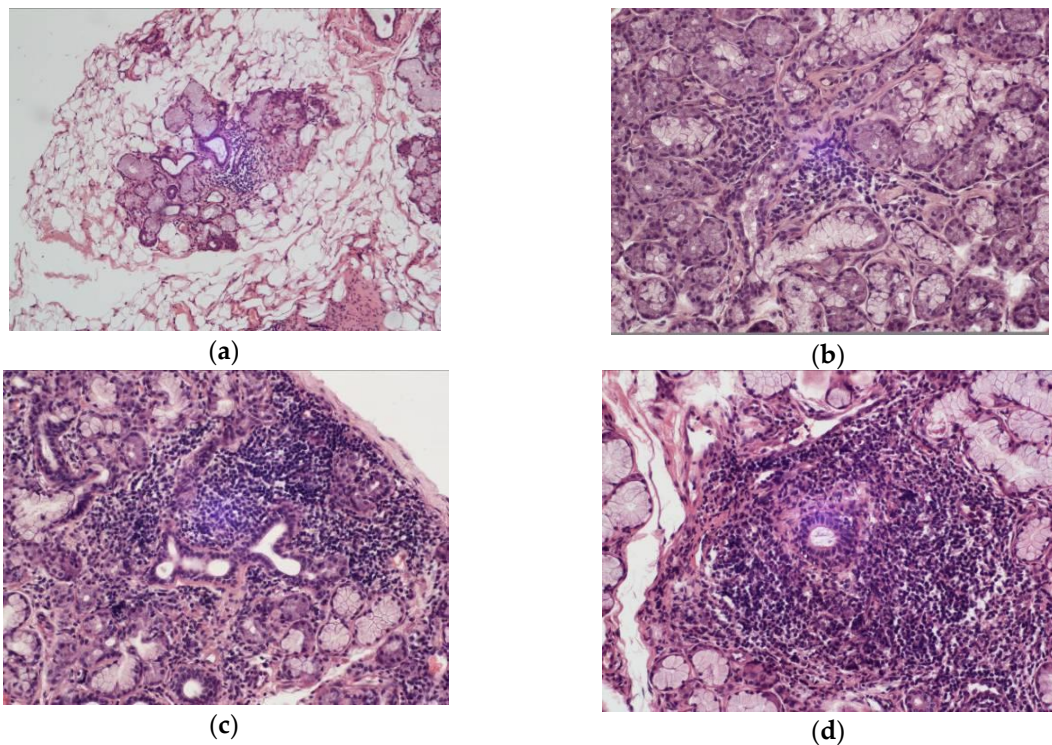

**Figure. S2:** Labial salivary gland biopsy (hematoxylin-eosin  $\times 200$ ): (a) enlarged intercalated ducts, focal lymphocytic infiltration, slight sialadenitis, lipid inclusions; (b) moderate sialadenitis, focal lymphocytic infiltration (up to 70 cells in focus); (c) severe sialadenitis, focal lymphocytic infiltration (up to 200 cells in focus); (d) severe sialadenitis, focal lymphocytic infiltration (up to 200 cells in foci, sporadic plasma cells), lymphocytic infiltration around the intercalated duct.

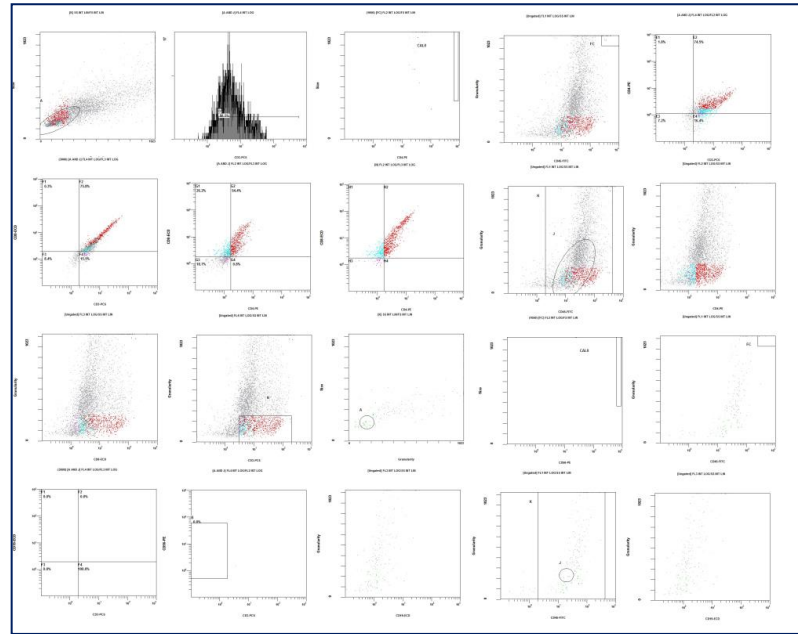

**Figure S3:** Representative set of scatter-plots of a patient with SS.

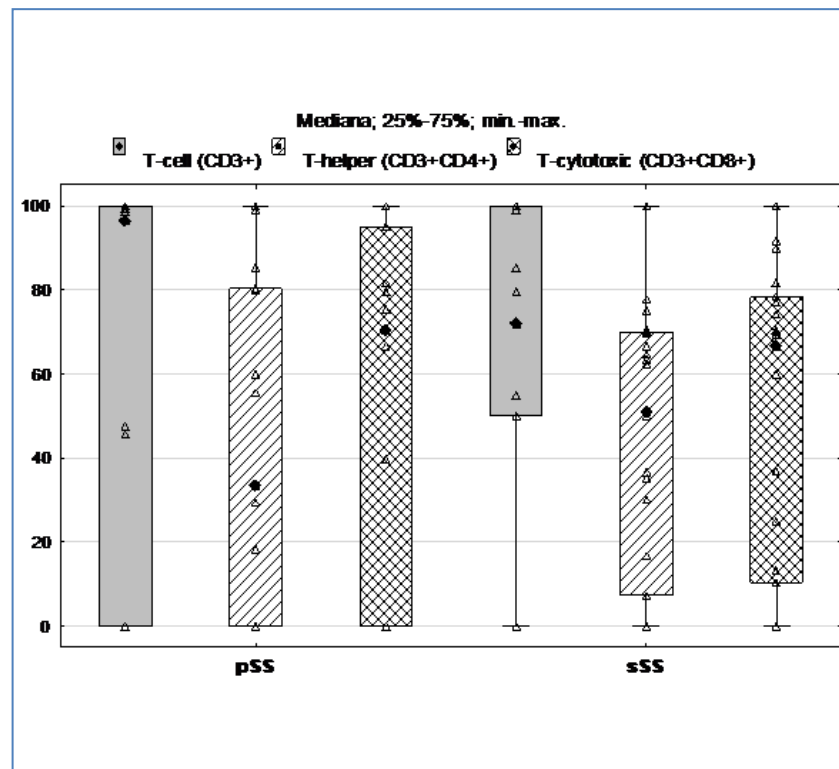

**Figure S4:** The relative number of subpopulations of T-helpers (CD4+) and cytotoxic T-lymphocytes (CD8+) in the studied groups of patients. pSS: Primary Sjogren's Syndrome; sSS: Secondary Sjogren's Syndrome.

**Table S1:** Cytological analysis of salivary sediment in studied patients

| Disease<br>(number of<br>patients) | Incidence rate, n (%) |              |              |             |
|------------------------------------|-----------------------|--------------|--------------|-------------|
|                                    | Epithelial<br>cells   | Erythrocytes | Granulocytes | Lymphocytes |

|                             |            |           |            |            |
|-----------------------------|------------|-----------|------------|------------|
| pSS <sup>1</sup> (n=12)     | 11 (91.6%) | 1 (8.3%)  | 5 (41.6%)  | 11 (91.6%) |
| sSS+RA <sup>2</sup> (n=13)  | 13 (100%)  | 1 (7.6%)  | 6 (46.2%)  | 10 (76.9%) |
| sSS+SLE <sup>3</sup> (n=8)  | 8 (100%)   | 1 (12.5%) | 2 (25%)    | 6 (75%)    |
| sSS+ SSD <sup>4</sup> (n=7) | 7 (100%)   | 0 (0%)    | 2 (28.5%)  | 5 (71.4%)  |
| Average for group           | 39 (97.5%) | 3 (7.5%)  | 15 (37.5%) | 32 (80%)   |
| Control group (n=20)        | 11 (55%)   | 0 (0%)    | 1 (5%)     | 0 (0%)     |

<sup>1</sup>primary Sjogren's Syndrome

<sup>2</sup>secondary Sjogren's Syndrome, associated with rheumatoid arthritis

<sup>3</sup>secondary Sjogren's Syndrome, associated with systemic lupus erythematosus

<sup>4</sup>secondary Sjogren's Syndrome, associated with systemic scleroderma

**Table S2:** Lymphocytes percentage in the cellular composition of salivary sediment in studied patients

| Disease<br>(number of patients) | Lymphocytes percentage in the cellular composition |       |        |      |
|---------------------------------|----------------------------------------------------|-------|--------|------|
|                                 | 0                                                  | 1-10% | 11-50% | >50% |
| pSS <sup>1</sup> (n=12)         | 1                                                  | 7     | 3      | 1    |
| sSS+RA <sup>2</sup> (n=13)      | 3                                                  | 8     | 1      | 1    |
| sSS+SLE <sup>3</sup> (n=8)      | 2                                                  | 5     | 1      | 0    |
| sSS+ SSD <sup>4</sup> (n=7)     | 2                                                  | 3     | 2      | 0    |
| Average for group               | 8                                                  | 23    | 7      | 2    |

<sup>1</sup>primary Sjogren's Syndrome

<sup>2</sup>secondary Sjogren's Syndrome, associated with rheumatoid arthritis

<sup>3</sup>secondary Sjogren's Syndrome, associated with systemic lupus erythematosus

<sup>4</sup>secondary Sjogren's Syndrome, associated with systemic scleroderma

**Table S3:** Immunogram of parotid saliva of the studied patients.

| Disease<br>(number of patients) | Incidence rate, % |                         |                             |                    |                                 |
|---------------------------------|-------------------|-------------------------|-----------------------------|--------------------|---------------------------------|
|                                 | T-cells<br>(CD3+) | T-<br>helpers<br>(CD4+) | T-cytotoxic cells<br>(CD8+) | B-cells<br>(CD19+) | Natural killer cells<br>(CD56+) |
| pSS <sup>1</sup> (n = 12)       | 90%               | 43.7%                   | 64%                         | 9%                 | 9%                              |
| sSS+RA <sup>2</sup> (n = 13)    | 65%               | 45%                     | 47.8%                       | 2.2%               | 8.7%                            |
| sSS+SLE <sup>3</sup> (n = 8)    | 66.8%             | 36.4%                   | 51.4%                       | 0                  | 0                               |
| sSS+SSD <sup>4</sup> (n = 7)    | 64.5%             | 41.5%                   | 48.9%                       | 0                  | 0                               |
| Average for group               | 71.7%             | 41.6%                   | 53%                         | 2.8%               | 4.4%                            |
| Control group                   | 0                 | 0                       | 0                           | 0                  | 0                               |

<sup>1</sup> primary Sjogren's Syndrome; <sup>2</sup> secondary Sjogren's Syndrome, associated with rheumatoid arthritis; <sup>3</sup> secondary Sjogren's Syndrome, associated with systemic lupus erythematosus; <sup>4</sup> secondary Sjogren's Syndrome, associated with systemic scleroderma.
